# Supplementary material for: Acidity and Cd2+ fluorescent sensing and selective CO2 adsorption by a water-stable Eu-MOF
Source: Royal Society of Chemistry journal article supplement (doi:10.1039/c9dt00539k), 2019-01-01
Supplement: c9dt00539k1.pdf [file c9dt00539k1.pdf]

## Supporting Information

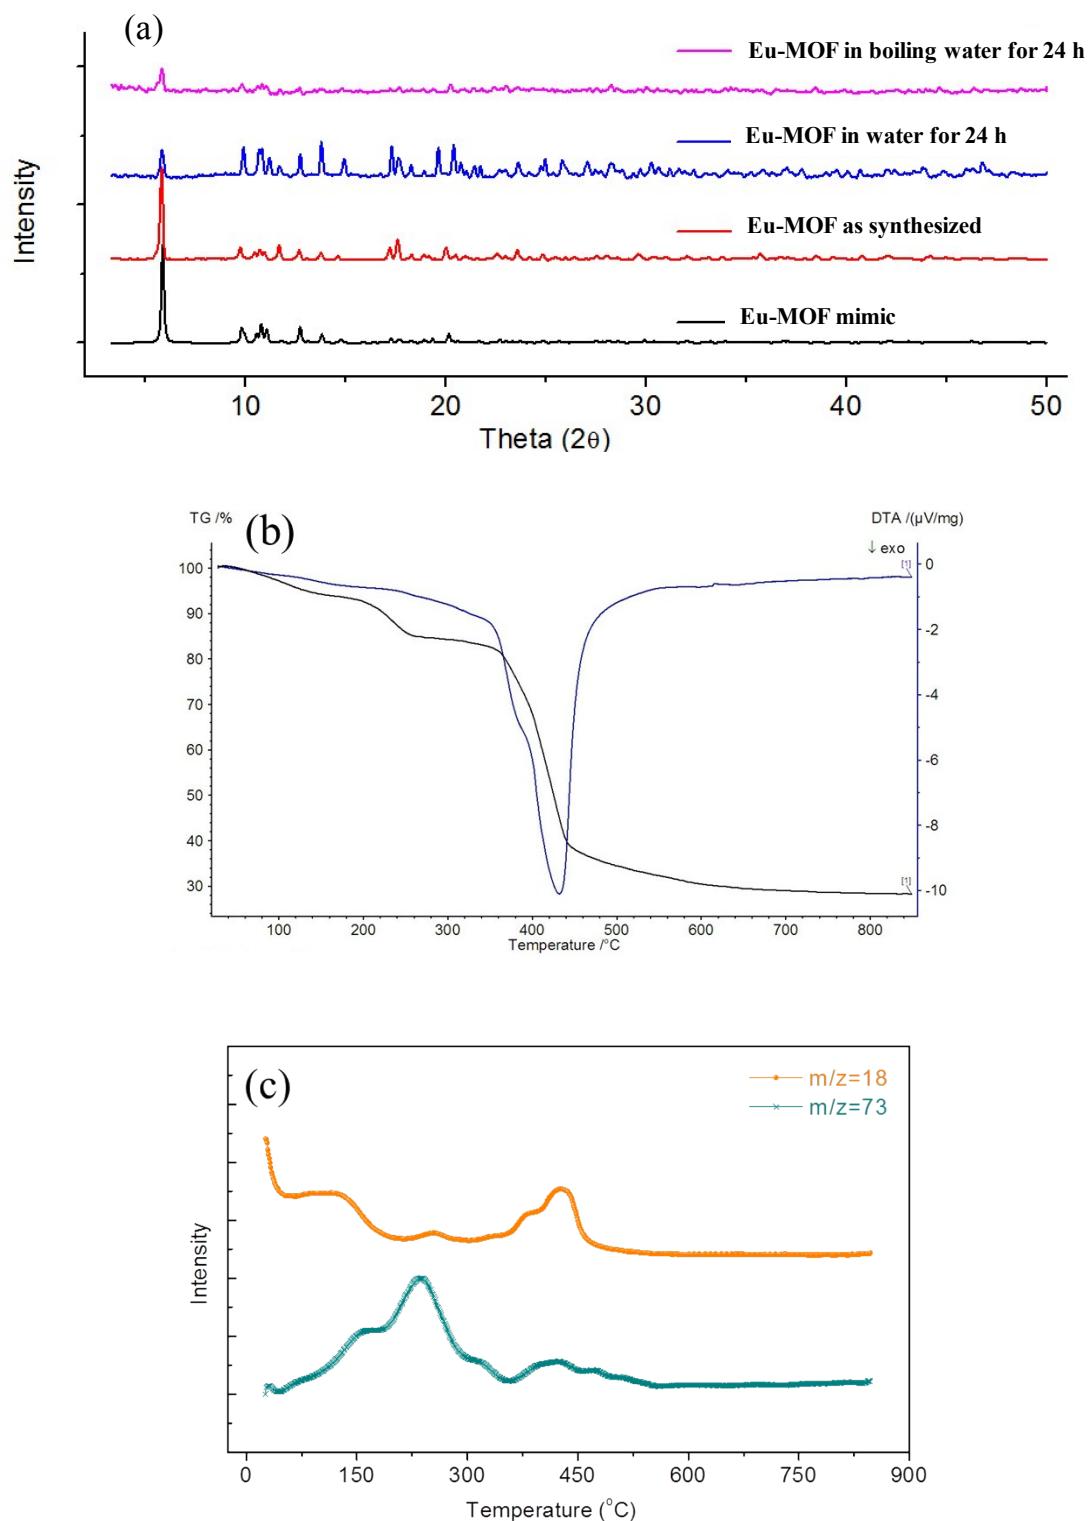

**Fig. S1** (a) XRD patterns of simulated, as synthesized Eu-MOF and after immersing in water and boiling water for 24 hours. (b) TG and DTA curves and (c) ion flow intensity in TG-MS measurement for Eu-MOF.

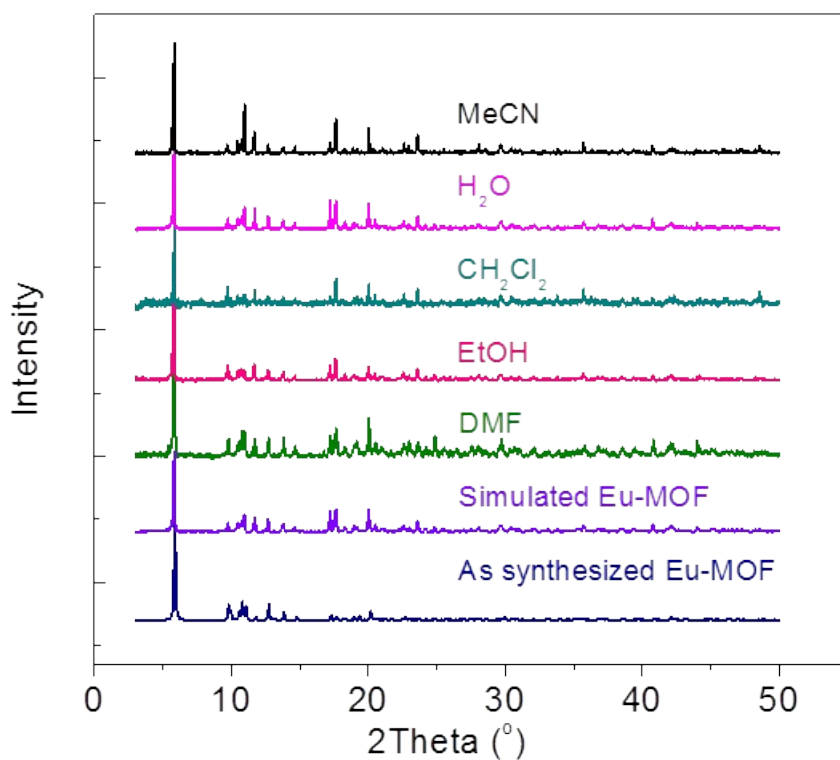

**Fig. S2** PXRD patterns of Eu-MOF after immersing in different solvents for 24 h.

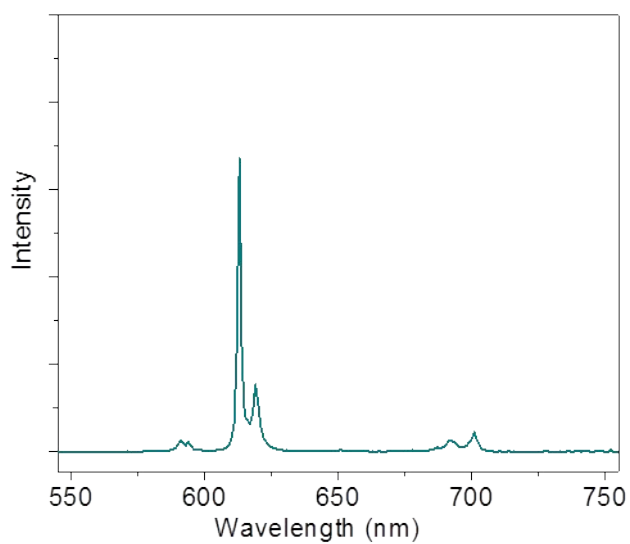

**Fig. S3** The emission spectra of Eu-MOF excited by 320 nm (solid state, r. t.).

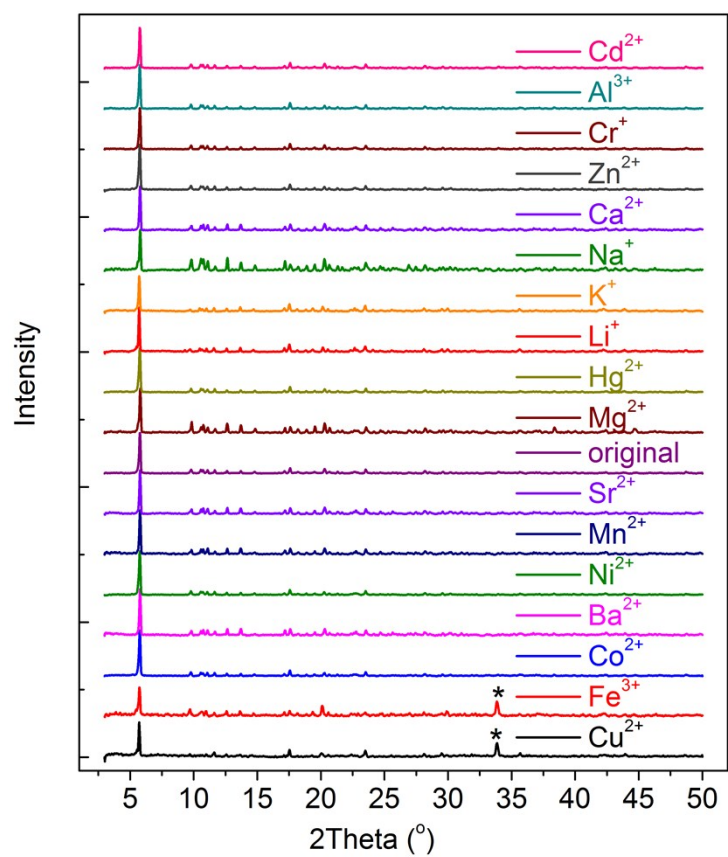

**Fig. S4** The PXR D patterns of Eu-MOF after immersed in different metal solutions (1 mM). (\* represents the new peak)

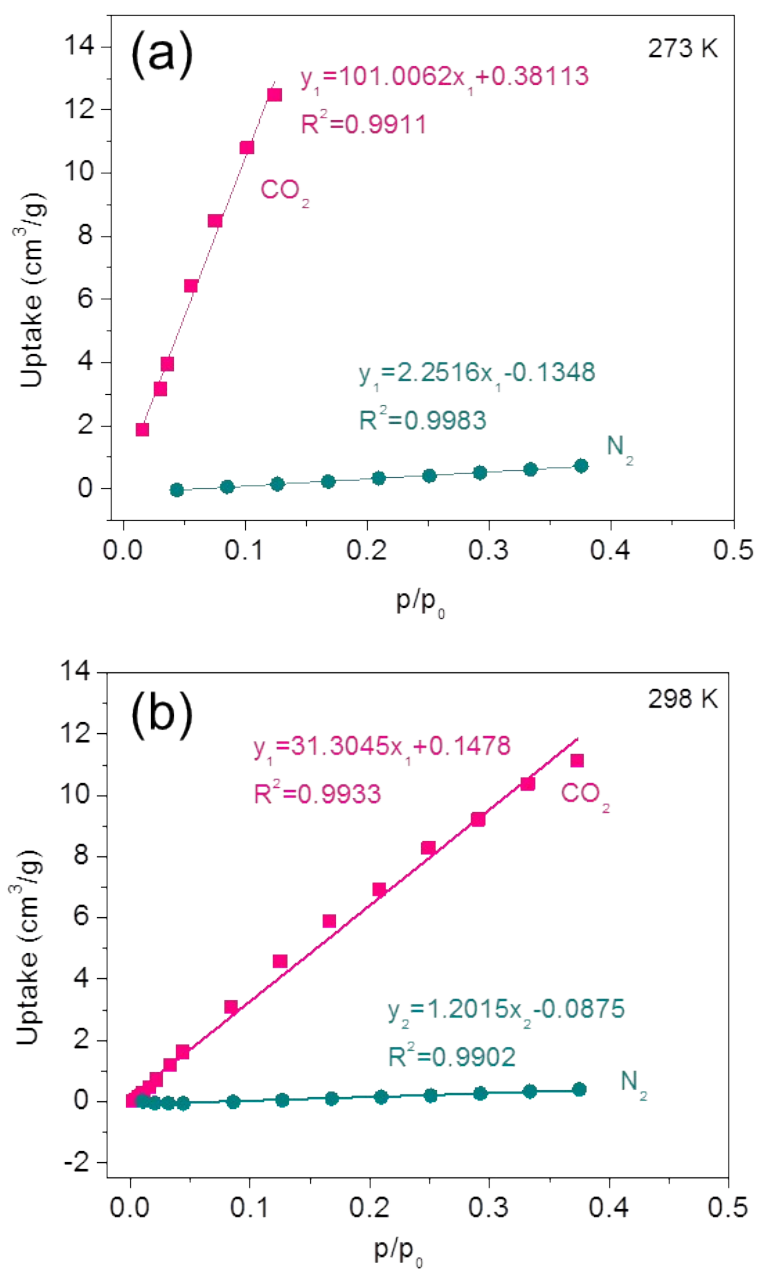

**Fig. S5** The initial slopes fitting of adsorption isotherms of CO<sub>2</sub> and N<sub>2</sub> for Eu-MOF at 273 K (a) and 298 K (b), respectively.

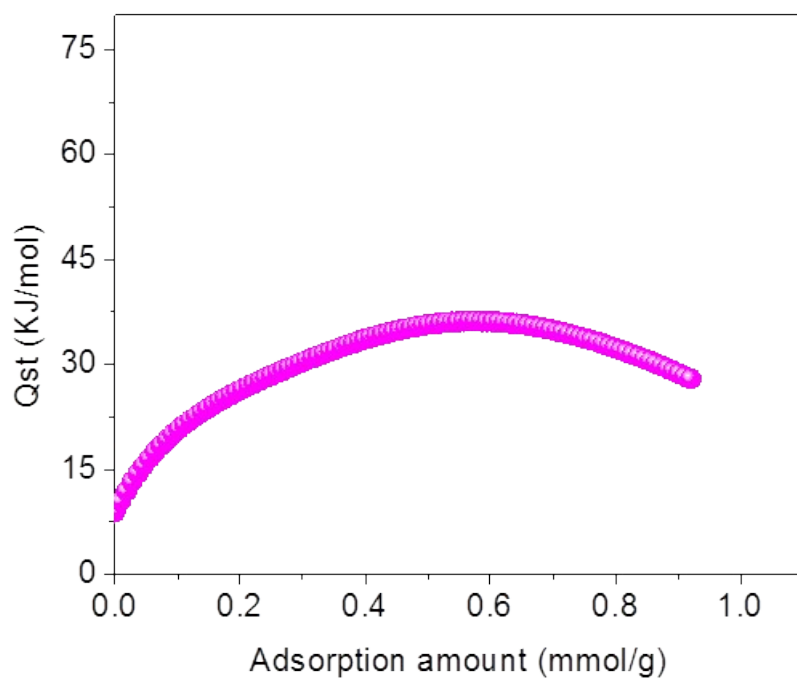

**Fig. S6** The enthalpy of adsorption ( $Q_{st}$ ) curve of  $\text{CO}_2$  for Eu-MOF.

Table S1 Crystal data and structure refinement for Eu-MOF.

| Complex                                                        | Eu-MOF                                                               |
|----------------------------------------------------------------|----------------------------------------------------------------------|
| Temperature                                                    | 293 K                                                                |
| Chemical Formula                                               | C <sub>24</sub> H <sub>21</sub> EuN <sub>2</sub> O <sub>9</sub> +[S] |
| Formula Weight                                                 | 633.40                                                               |
| crystal system                                                 | Triclinic                                                            |
| space group                                                    | <i>P</i> - <i>I</i>                                                  |
| <i>a</i> (Å)                                                   | 10.0077(6)                                                           |
| <i>b</i> (Å)                                                   | 10.3815(5)                                                           |
| <i>c</i> (Å)                                                   | 15.9271(7)                                                           |
| $\alpha$ (deg)                                                 | 71.109(4)                                                            |
| $\beta$ (deg)                                                  | 85.541(4)                                                            |
| $\gamma$ (deg)                                                 | 64.379(5)                                                            |
| <i>V</i> (Å <sup>3</sup> )                                     | 1407.91(12)                                                          |
| <i>Z</i>                                                       | 2                                                                    |
| <i>D</i> <sub>Calcd</sub> (g cm <sup>-3</sup> )                | 1.494                                                                |
| $\mu$ (mm <sup>-1</sup> )                                      | 16.372                                                               |
| Ref. collected                                                 | 8447                                                                 |
| Independent ref.                                               | 4680                                                                 |
| <i>R</i> <sub>int</sub>                                        | 0.0560                                                               |
| GOF                                                            | 1.031                                                                |
| <i>R</i> 1 <sup>a</sup> [ <i>I</i> > 2 $\sigma$ ( <i>I</i> )]  | 0.0567                                                               |
| <i>wR</i> 2 <sup>b</sup> [ <i>I</i> > 2 $\sigma$ ( <i>I</i> )] | 0.1493                                                               |

$$^a R_1 = \sum(|F_o| - |F_c|) / \sum|F_o|; \quad ^b wR_2 = [\sum w(F_o^2 - F_c^2)^2 / \sum w(F_o^2)^2]^{1/2}$$

Table S2 Lifetimes of Eu-MOF in different acidic solution.

|                    | pH=3 | pH=4 | pH=5 | pH=6 | pH=7 |
|--------------------|------|------|------|------|------|
| $\tau/\mu\text{s}$ | 358  | 352  | 357  | 348  | 308  |

Table S3 CO<sub>2</sub> adsorption performance and adsorption enthalpy for some similar lanthanide-carboxylate MOFs.

| MOF               | Selectivity <sup>a</sup> | Selectivity <sup>b</sup> | S <sub>BET</sub> <sup>c</sup> (m <sup>2</sup> /g <sup>-1</sup> ) | CO <sub>2</sub><br><sup>d</sup> (wt%) | Q <sub>st</sub> (CO <sub>2</sub> )<br>KJ/mol | References       |
|-------------------|--------------------------|--------------------------|------------------------------------------------------------------|---------------------------------------|----------------------------------------------|------------------|
| La-TTCA           | -/-                      | 940/188                  | -                                                                | 13.9/10.5                             | 32.8 to 35.4                                 | S1               |
| <i>Eu-MOF</i>     | <i>44.9/26.1</i>         | <i>109.4/28.7</i>        | <i>209.7</i>                                                     | <i>5.7/4.1</i>                        | <i>9.2 to 35.6</i>                           | <i>This work</i> |
| La-BTN            | -/-                      | 93 to 38/-               | -                                                                | 17.2/-                                | 26                                           | S2               |
| Eu-BDC            | -/57.4                   | -/72.5                   | 124                                                              | -/3.6                                 | -                                            | S3               |
| Tb-FDA            | -/-                      | -/36                     | 1005.6                                                           | -/12                                  | -                                            | S4               |
| Y-TPO             | -/-                      | 22.0/28.2                | 692.0                                                            | 13.1/8.5                              | -                                            | S5               |
| Eu-TPO            | -/-                      | 20.9/25.6                | 495.5                                                            | 10.5/6.2                              | -                                            | S5               |
| Pr-LOF            | 18.6/-                   | -/-                      | 484                                                              | 7.1/-                                 | -                                            | S6               |
| Eu- <i>p</i> -CDC | -/-                      | -/8                      | 108                                                              | -/1.3                                 | -                                            | S7               |

For simplicity, the MOF in the table uses a proxy for instead. <sup>a</sup>Selectivity of CO<sub>2</sub>/N<sub>2</sub> calculated from the initial slope at 1 atm and 273/298 K, respectively. <sup>b</sup>Selectivity of CO<sub>2</sub>/N<sub>2</sub> calculated from IAST method at 1 atm and 273/298 K, respectively. <sup>c</sup> Brunauer–Emmett–Teller (BET) surface area. <sup>d</sup> CO<sub>2</sub> uptake at 273/298 K and 1 atm.

## References

- S1 Y. N. Gong, P. Xiong, C. T. He, J. H. Deng and D. C. Zhong, *Inorg. Chem.*, 2018, 57, 5013.
- S2 J. Duan, M. Higuchi, R. Krishna, T. Kiyonaga, Y. Tsutsumi, Y. Sato, Y. Kubota, M. Takata and S. Kitagawa, *Chem. Sci.*, 2014, 5, 660.
- S3 W. M. Liao, H. T. Shi, X. H. Shi and Y. G. Yin, *Dalton Trans.*, 2014, 43, 15305.
- S4 T. Kambe, R. Sakamoto, K. Hoshiko, K. Takada, M. Miyachi, J.-H. Ryu, S. Sasaki, J. Kim, K. Nakazato, M. Takata and H. Nishihara, *J. Am. Chem. Soc.*, 2013, 135, 2462.
- S5 Z. J. Lin, Z. Yang, T. F. Liu, Y. B. Huang and R. Cao, *Inorg. Chem.*, 2012, 51, 1813.
- S6 Z. Lin, R. Zou, W. Xia, L. Chen, X. Wang, F. Liao, Y. Wang, J. Lin and A. K. Burrell, *J. Mater. Chem.*, 2012, 22, 21076.
- S7 S.-L. Huang, Y.-J. Lin, W.-B. Yu and G.-X. Jin, *ChemPlusChem*, 2012, 77, 141.
